# Supplementary material
Source: PubMed Central journal article supplement (PMC5313102)

**TITLE:** SMAD3 regulates follicle-stimulating hormone synthesis by pituitary gonadotrope cells *in vivo*

**AUTHORS:** Yining Li<sup>1</sup>, Gauthier Schang<sup>1</sup>, Ulrich Boehm<sup>2</sup>, Chu-Xia Deng<sup>3</sup>, Jonathan Graff<sup>4</sup>, and Daniel J. Bernard<sup>1</sup>

**FIGURE LEGENDS:**

**FIGURE S1.** 10-week-old control and cKO mice have comparable body weights. A) Body weight (in g) of 10-week-old control and cKO males (n=13 or 11). B) Body weights of 10-week-old control and cKO females (n=13 or 12).

**FIGURE S2.** Serum testosterone levels do not differ significantly between 10-week-old control and cKO males.

**FIGURE S3.** Gene expression in primary pituitary cells. A,B) *Lhb*, C,D) *Cga*, and E,F) *Gnrhr* mRNA levels in primary pituitary cell cultures from female (left column) and male (right column) control and cKO mice. Bars represent mean (+ SEM) from 3 independent experiments. Bars with different symbols (\$) and (¢) differ significantly. The *Fshb* data from the same cultures are presented in Fig. 10.

Figure S1

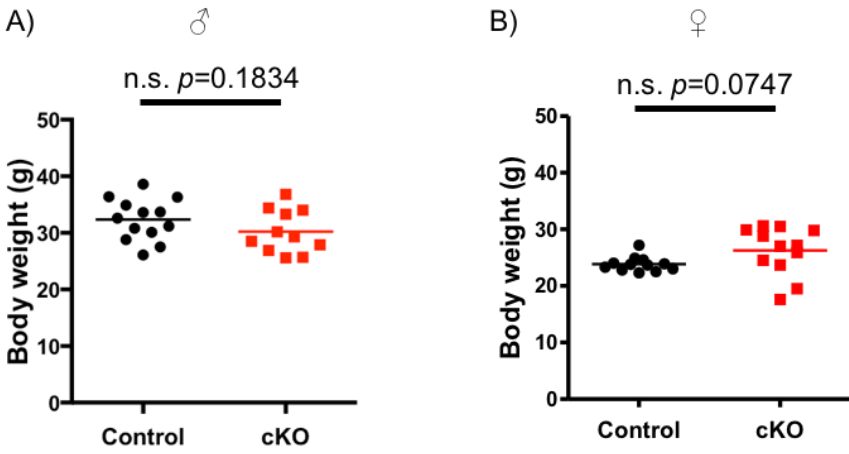

Figure S2

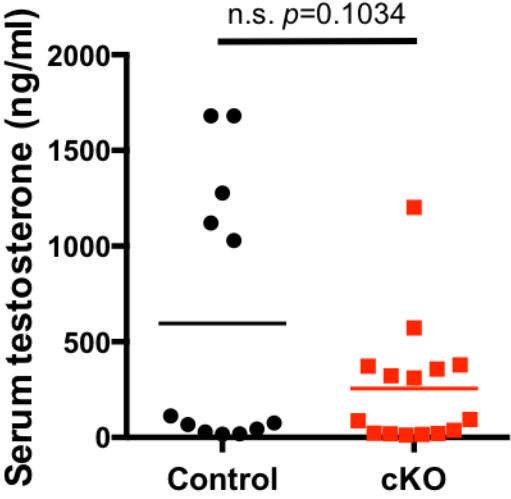

Figure S3

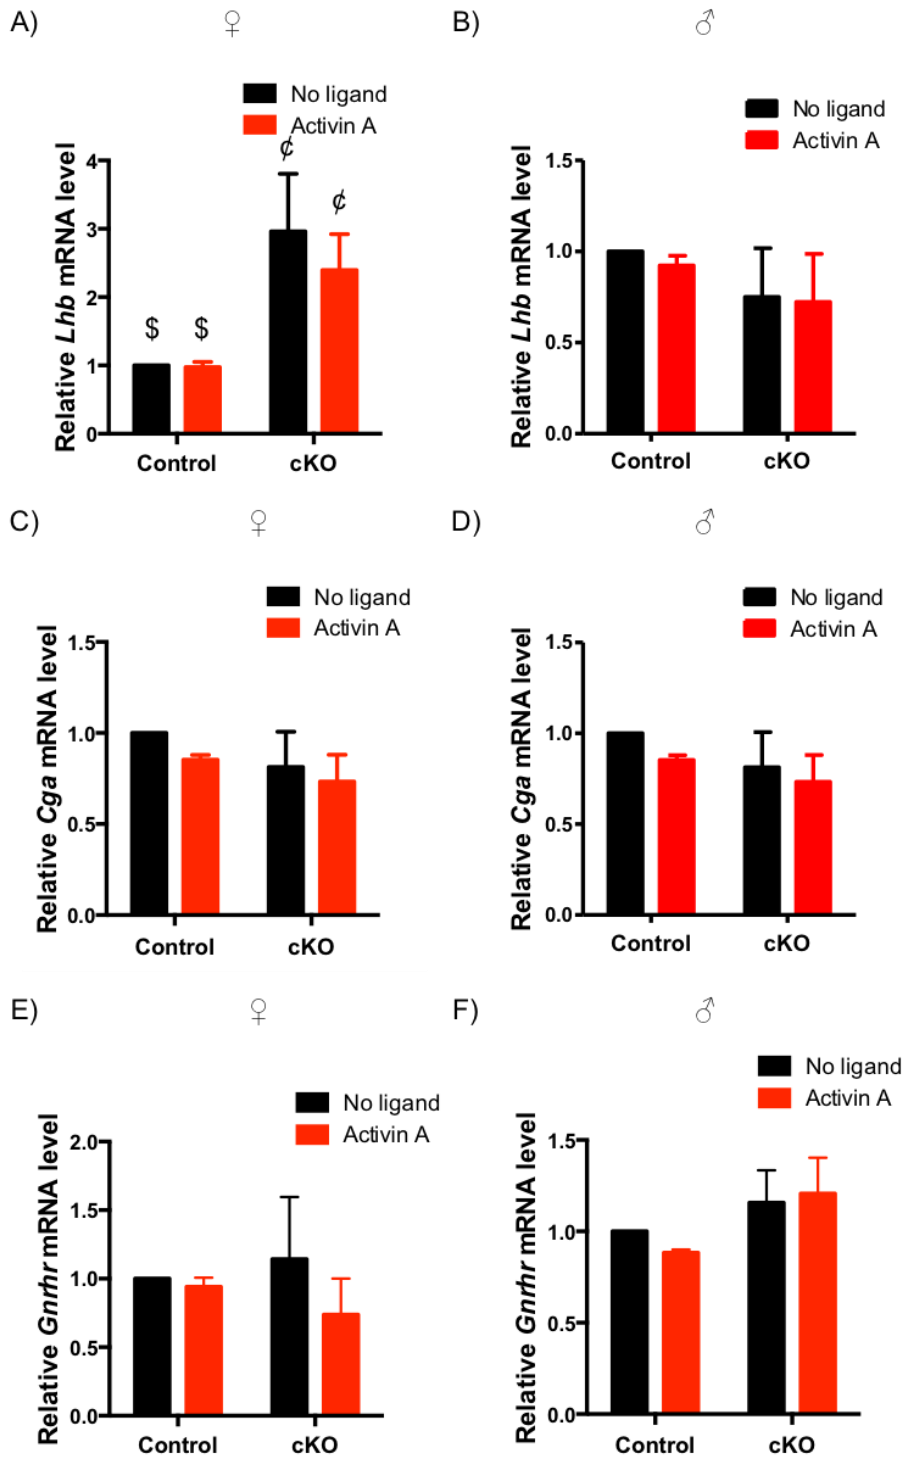

Supplement: 10.1074_M116.759167_jbc.M116.759167-1.pdf [file 10.1074_M116.759167_jbc.M116.759167-1.pdf]
